# Supplementary material for: Name matters! The cost of having a foreign-sounding name in the Swedish private housing market
Source: PLoS One. 2022 Jun 8;17(6):e0268840. doi: 10.1371/journal.pone.0268840 (PMC9176839; doi:10.1371/journal.pone.0268840)
Supplement: S1 File — (DO) [file pone.0268840.s002.do]

****the name of the data set is  "Pairwise dataset  Name Matters Molla Rhawi Lampi.dta"


*****pair combinations**************************
***johan & ali, pair combination=1
***johan & yong, pair combination=2
***johan & milan, pair combination=3
***ali & milan, pair combination=4
***yong & milan, pair combination=5
***ali & yong, paircombination=6


****************************TABLE 4 starts here***********************************
****Shares of call backs per person in each pair combination
*********************************************************************************


sum callbackjohan if paircombination==1

sum callbackali if paircombination==1

sum callbackjohan if paircombination==2

sum callbackyong if paircombination==2

sum callbackjohan if paircombination==3

sum callbackmilan if paircombination==3

sum callbackali if paircombination==4

sum callbackmilan if paircombination==4

sum callbackmilan if paircombination==5

sum callbackyong if paircombination==5

sum callbackali if paircombination==6

sum callbackyong if paircombination==6


*****Singrank test (Wilcoxon matched-pairs signed-rank test) for Table 4

signrank callbackjohan=callbackali if paircombination==1
signrank callbackjohan=callbackyong if paircombination==2
signrank callbackjohan=callbackmilan if paircombination==3
signrank callbackali=callbackmilan if paircombination==4
signrank callbackmilan=callbackyong if paircombination==5
signrank callbackali=callbackyong if paircombination==6
*************************************************************************************
*******************************TABLE 4 ENDS HERE*************************************


****Test whether each applicant get about same share of callbacks regardless with whom they compete with. The answer is No. 
*************************************************************************************************************************************************************


sort paircombination

**Johan vs Ali compared to Johan vs Yong, Johan vs Ali compared to Johan vs Milan etc
prtest callbackjohan, by(paircombination), if paircombination==1|paircombination==2
prtest callbackjohan, by(paircombination), if paircombination==1|paircombination==3
prtest callbackjohan, by(paircombination), if paircombination==2|paircombination==3
 

**Ali against johan vs Milan, Ali against Johan vs Yong, Ali against Yong vs Milan
prtest callbackali, by(paircombination), if paircombination==1|paircombination==4
prtest callbackali, by(paircombination), if paircombination==1|paircombination==6
prtest callbackali, by(paircombination), if paircombination==4|paircombination==6
 

**Milan against johan vs Ali, Milan against Johan vs Yong, Milan against Ali vs Yong
prtest callbackmilan, by(paircombination), if paircombination==3|paircombination==4
prtest callbackmilan, by(paircombination), if paircombination==3|paircombination==5
prtest callbackmilan, by(paircombination), if paircombination==4|paircombination==5

**Yong against johan vs Ali, Yong against Johan vs Milan, Yong against Milan vs Ali

prtest callbackyong, by(paircombination), if paircombination==2|paircombination==6
prtest callbackyong, by(paircombination), if paircombination==2|paircombination==5
prtest callbackyong, by(paircombination), if paircombination==5|paircombination==6


******************************************************************************
****************TABLE B1 in Appendix****************************************
***************************************************************************

**johanali johanyong johanmilan alimilan milanyong means that both have received a callback


***Share of callbacks for both applicants, whole sample, TAble B1 in Appendix


sum johanali if paircombination==1

sum johanyong if paircombination==2

sum johanmilan if paircombination==3

sum alimilan if paircombination==4

sum milanyong if paircombination==5

sum aliyong if paircombination==6


***Share of callbacks for both applicants, conditional on that landlord has sent at least one amswer, Table B1 in Appendix
****nocallback means that none has received any callbacks, so they are excluded from the calculations
****johanali means that both have received a call back, johanyong that both have received a callback etc

sum johanali if paircombination==1 & nocallback==0

sum johanyong if paircombination==2 & nocallback==0

sum johanmilan if paircombination==3 & nocallback==0


sum alimilan if paircombination==4 & nocallback==0


sum milanyong if paircombination==5 & nocallback==0


sum aliyong if paircombination==6 & nocallback==0

************************TABLE B1 ENDS HERE***************************
**********************************************************************


 
